# Supplementary material
Source: publisher site journal article supplement (https://www.dovepress.com/article/358512)
Supplement: Supplementary file 1 [file get_supplementary_file.php]

# **Supplementary Materials**

**Table S1.** Reasons for censoring in the study population and the drop-out population

| **Reasons** | **Worsened (N=403)** | | **Stable (N=550)** | | **Drop out**  **(N=385)** | |
| --- | --- | --- | --- | --- | --- | --- |
|  | **N** | **%** | **N** | **%** | **N** | **%** |
| Mortality | 21 | 5.2 | 14 | 2.6 | 39 | 10.1 |
| Institutionalization due to functional impairment | 36 | 8.9 | 18 | 3.3 | 105 | 27.3 |
| Moving out due to health problems | 8 | 2.0 | 7 | 1.3 | 21 | 5.5 |
| Moving out due to reasons other than health problems | 13 | 3.2 | 21 | 3.8 | 55 | 14.3 |
| Refusal of the subject | 16 | 4.0 | 17 | 3.1 | 78 | 20.3 |
| Refusal of the proxy | 1 | 0.25 | 1 | 0.18 | 9 | 2.3 |
| Out of contact | 1 | 0.25 | 0 | 0 | 8 | 2.1 |
| Transient leaving | 0 | 0 | 3 | 5.5 | 1 | 0.26 |

**Table S2.** The 34 items of the frailty index according to 4 domains

| **ADL** | **Mobility** |
| --- | --- |
| Changes in everyday activities | Impaired mobility |
| Problems getting dressed | Musculoskeletal problems |
| Problems with bathing | Bradykinesia of the limbs |
| Problems carrying out personal grooming | Poor muscle tone in limbs |
| Urinary incontinence | Poor limb coordination |
| Toileting problems | Poor coordination, trunk |
| Gastrointestinal problems | Poor standing posture |
| Problems cooking | Irregular gait pattern |
| Problems going out alone | Falls |
| **Cognitive function & Mood** | **Comorbidity** |
| Mood problems | History of stroke |
| Tiredness at all time | History of diabetes mellitus |
| Depression | Hypertension |
| Memory changes | Angina |
| Changes in general mental functioning | Myocardial infarction |
| History related to cognitive impairment or loss | Congestive heart failure |
|  | Chronic obstructive pulmonary disease |
|  | Asthma |
|  | Cancer |
|  | Chronic kidney disease |

**Table S3.** Baseline characteristics of the study population and the drop-out population

| **Characteristics** | **Study population (n = 953)** | **Drop out population (n = 378)** | **p-value** |
| --- | --- | --- | --- |
| Age | 73.9 ± 5.7 | 75.5 ± 7.5 | <0.001 |
| Female | 537 (56.4) | 198 (52.4) | 0.21 |
| Baseline FI | 0.16 ± 0.12 | 0.20 ± 0.16 | <0.001 |
| Composite outcome incidence | 89 (9.3) | 144 (38.1) | <0.001 |
| Education years | 5.0 ± 3.3 | 5.4 ± 3.7 | 0.09 |
| Low income | 67 (7.0) | 24 (6.4) | 0.75 |
| Multimorbidity | 370 (38.8) | 154 (40.7) | 0.56 |
| Dominant grip strength | 22.6 ± 9.7 | 21.6 ± 10.5 | 0.09 |
| ADL disability | 107 (11.2) | 74 (19.6) | <0.001 |
| IADL disability | 288 (30.2) | 149 (39.4) | 0.002 |
| Depression | 81 (8.5) | 62 (16.5) | <0.001 |
| Cognitive dysfunction | 256 (26.9) | 130 (34.7) | 0.008 |
| Polypharmacy | 212 (22.3) | 95 (25.1) | 0.29 |
| History of falling in the previous year | 0.24 ± 0.91 | 0.28 ± 1.15 | 0.59 |

Data are mean ± standard deviation or n (%).

**Abbreviations:** ADL, activity of daily living; FI, frailty index; IADL, instrumental activity of daily living; SD, standard deviation.

**Table S4.** Changes of deficit during 2 years according to the domain of frailty index

| **Domain** | **Group FW** | **Group NW** | **P-value*** | **Group FS** | **Group NS** |
| --- | --- | --- | --- | --- | --- |
| ADL | 0.17 ± 0.20 | 0.11 ± 0.13 | 0.009 | -0.08 ± 0.17 | -0.02 ± 0.10 |
| Mobility | 0.17 ± 0.17 | 0.14 ± 0.15 | 0.16 | -0.10 ± 0.19 | -0.03 ± 0.13 |
| Cognitive Function & Mood | 0.13 ± 0.22 | 0.14 ± 0.20 | 0.54 | -0.07 ± 0.21 | -0.02 ± 0.14 |
| Comorbidity | 0.04 ± 0.06 | 0.05 ± 0.07 | 0.45 | 0.03 ± 0.07 | 0.02 ± 0.05 |

Data are mean ± standard deviation or n (%).

FW (frail at baseline and worsened) vs. FS (frail at baseline and stable) vs. (NW (non-frail at baseline and worsened) vs. NS (non-frail at baseline and stable)

*Independent t-test between Group FW and Group NW.

**Abbreviations:** ADL, Activities in daily living; SD, standard deviation.
